# Supplementary material for: Male Armaments and Reproductive Behavior in “Nutcracker” Camel Crickets (Rhaphidophoridae, Pristoceuthophilus)
Source: PubMed Central journal article supplement (PMC4553529; doi:10.3390/insects6010085), 2015-01-07
Supplement: insects-06-00085-s001.pdf [file insects-06-00085-s001.pdf]

## Supplementary Materials

**Table S1.** Single-factor ANOVAs comparing traits of the five species. Hind leg traits are body size-controlled. See Table S2 for between-species pair comparisons (Tukey's HSD).

| Trait                                  | <i>F</i> | df     | <i>p</i>       |
|----------------------------------------|----------|--------|----------------|
| Mass                                   | 71.89    | 4, 236 | < <b>0.001</b> |
| Pronotum (body size)                   | 50.17    | 4, 236 | < <b>0.001</b> |
| Spine length/pronotum                  | 4.36     | 4, 236 | <b>0.002</b>   |
| Flange area/pronotum                   | 13.97    | 3, 137 | < <b>0.001</b> |
| 1° angle of tibial deflection/pronotum | 8.34     | 4, 236 | < <b>0.001</b> |
| 2° angle of tibial deflection/pronotum | 17.49    | 3, 137 | < <b>0.001</b> |
| Femur area/pronotum                    | 66.01    | 4, 236 | < <b>0.001</b> |
| Femur length/pronotum                  | 6.45     | 4, 236 | < <b>0.001</b> |

**Table S2.** Tukey's HSD comparisons of body and leg traits between species (Pariz = *P. arizonae*; PHua = *P. 'Huachuca summer'*; PMad = *P. 'Madera'*; Pmar = *P. marmoratus*; PMP = *P. 'Mt. Pinos'*).

| Trait                 | Species 1 | Species 2 | Difference | <i>p</i>       |
|-----------------------|-----------|-----------|------------|----------------|
| Mass                  | Pariz     | PMP       | -0.286     | < <b>0.001</b> |
|                       | Pariz     | PHua      | 0.017      | 0.985          |
|                       | Pariz     | PMad      | -0.082     | 0.205          |
|                       | Pariz     | Pmar      | -0.145     | < <b>0.001</b> |
|                       | PMP       | PHua      | 0.303      | < <b>0.001</b> |
|                       | PMP       | PMad      | 0.204      | < <b>0.001</b> |
|                       | PMP       | Pmar      | 0.141      | < <b>0.001</b> |
|                       | PHua      | PMad      | -0.099     | <b>0.009</b>   |
|                       | PHua      | Pmar      | -0.162     | < <b>0.001</b> |
|                       | PMad      | Pmar      | -0.063     | 0.172          |
| Pronotum              | Pariz     | PMP       | -0.578     | < <b>0.001</b> |
|                       | Pariz     | PHua      | 0.448      | <b>0.004</b>   |
|                       | Pariz     | PMad      | -0.064     | 0.995          |
|                       | Pariz     | Pmar      | -0.313     | 0.083          |
|                       | PMP       | PHua      | 1.026      | < <b>0.001</b> |
|                       | PMP       | PMad      | 0.515      | < <b>0.001</b> |
|                       | PMP       | Pmar      | 0.265      | <b>0.001</b>   |
|                       | PHua      | PMad      | -0.512     | < <b>0.001</b> |
|                       | PHua      | Pmar      | -0.761     | < <b>0.001</b> |
|                       | PMad      | Pmar      | -0.249     | 0.224          |
| Spine length/pronotum | Pariz     | PMP       | 0.006      | 0.072          |
|                       | Pariz     | PHua      | 0.008      | <b>0.005</b>   |
|                       | Pariz     | PMad      | 0.002      | 0.957          |
|                       | Pariz     | Pmar      | 0.007      | <b>0.017</b>   |
|                       | PMP       | PHua      | 0.002      | 0.516          |
|                       | PMP       | PMad      | -0.004     | 0.396          |
|                       | PMP       | Pmar      | 0.001      | 0.926          |
|                       | PHua      | PMad      | -0.006     | 0.055          |
|                       | PHua      | Pmar      | -0.001     | 0.905          |
|                       | PMad      | Pmar      | 0.005      | 0.158          |

Table S2. *Cont.*

| Trait                                  | Species 1 | Species 2 | Difference | <i>p</i>         |
|----------------------------------------|-----------|-----------|------------|------------------|
| Flange area/pronotum                   | Pariz     | PMP       | 0          | 0.953            |
|                                        | Pariz     | PHua      | 0.001      | <b>&lt;0.001</b> |
|                                        | Pariz     | PMad      | 0          | 0.394            |
|                                        | PMP       | PHua      | 0.001      | <b>&lt;0.001</b> |
|                                        | PMP       | PMad      | 0          | 0.426            |
|                                        | PHua      | PMad      | 0          | 0.121            |
| 1° angle of tibial deflection/pronotum | Pariz     | PMP       | 5.466      | <b>&lt;0.001</b> |
|                                        | Pariz     | PHua      | 2.678      | 0.137            |
|                                        | Pariz     | PMad      | 2.521      | 0.401            |
|                                        | Pariz     | Pmar      | 3.373      | <b>0.021</b>     |
|                                        | PMP       | PHua      | -2.788     | <b>&lt;0.001</b> |
|                                        | PMP       | PMad      | -2.945     | 0.056            |
|                                        | PMP       | Pmar      | -2.093     | <b>0.006</b>     |
|                                        | PHua      | PMad      | -0.157     | 1                |
|                                        | PHua      | Pmar      | 0.695      | 0.821            |
|                                        | PMad      | Pmar      | 0.852      | 0.933            |
| 2° angle of tibial deflection/pronotum | Pariz     | PMP       | 4.133      | <b>&lt;0.001</b> |
|                                        | Pariz     | PHua      | 1.629      | 0.133            |
|                                        | Pariz     | PMad      | 1.482      | 0.391            |
|                                        | PMP       | PHua      | -2.504     | <b>&lt;0.001</b> |
|                                        | PMP       | PMad      | -2.65      | <b>0.001</b>     |
|                                        | PHua      | PMad      | -0.147     | 0.997            |
| Femur area/pronotum                    | Pariz     | PMP       | -0.021     | <b>&lt;0.001</b> |
|                                        | Pariz     | PHua      | 0.007      | <b>0.004</b>     |
|                                        | Pariz     | PMad      | -0.005     | 0.622            |
|                                        | Pariz     | Pmar      | -0.009     | <b>0.024</b>     |
|                                        | PMP       | PHua      | 0.028      | <b>&lt;0.001</b> |
|                                        | PMP       | PMad      | 0.016      | <b>&lt;0.001</b> |
|                                        | PMP       | Pmar      | 0.012      | <b>&lt;0.001</b> |
|                                        | PHua      | PMad      | -0.012     | <b>&lt;0.001</b> |
|                                        | PHua      | Pmar      | -0.015     | <b>&lt;0.001</b> |
|                                        | PMad      | Pmar      | -0.003     | 0.748            |
| Femur length/pronotum                  | Pariz     | PMP       | -0.014     | <b>0.005</b>     |
|                                        | Pariz     | PHua      | -0.017     | <b>&lt;0.001</b> |
|                                        | Pariz     | PMad      | -0.019     | <b>0.002</b>     |
|                                        | Pariz     | Pmar      | -0.01      | 0.097            |
|                                        | PMP       | PHua      | -0.003     | 0.696            |
|                                        | PMP       | PMad      | -0.005     | 0.645            |
|                                        | PMP       | Pmar      | 0.004      | 0.327            |
|                                        | PHua      | PMad      | -0.002     | 0.981            |
|                                        | PHua      | Pmar      | 0.007      | <b>0.014</b>     |
|                                        | PMad      | Pmar      | 0.009      | 0.096            |

**Table S3.** Pairwise comparisons of voluntary copulation duration between species using the Dwass–Steel–Critchlow–Fligner Test (PHua = *P.* ‘Huachuca summer’; PMad = *P.* ‘Madera’; Pmar = *P. marmoratus*; PMP = *P.* ‘Mt. Pinos’).

| Species 1 | Species 2 | Test Statistic | <i>p</i>       |
|-----------|-----------|----------------|----------------|
| PMP       | PHua      | 40.92          | <0.001         |
| PMP       | PMad      | 5.00           | <b>0.002</b>   |
| PMP       | Pmar      | 19.88          | < <b>0.001</b> |
| PHua      | PMad      | −28.63         | < <b>0.001</b> |
| PHua      | Pmar      | −6.02          | < <b>0.001</b> |
| PMad      | Pmar      | 8.81           | < <b>0.001</b> |

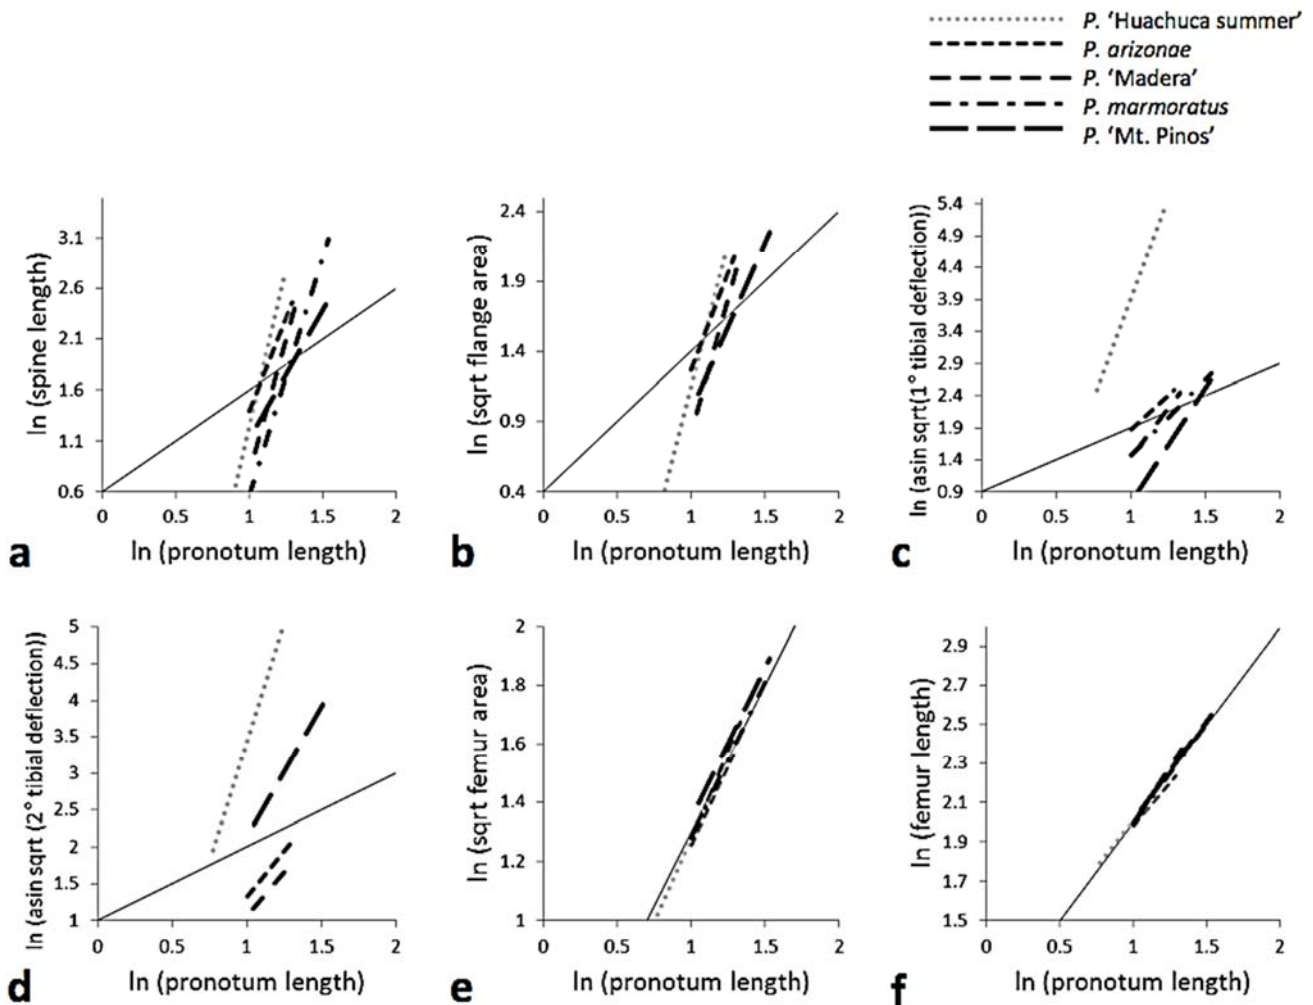

**Figure S1.** RMA regression slopes showing log-transformed pronotum length *versus* log-transformed (a) spine length, (b) square root-transformed flange area, (c), arcsine square root-transformed primary tibial deflection, (d) arcsine square root-transformed secondary tibial deflection, (e) square root-transformed femur area and (f) femur length. The solid line is the line of isometry (slope = 1), while each dashed line represents a different species (see the legend). Lines are drawn such that the endpoints encompass the observed range of variation in pronotum length. *Pristocethophilus marmoratus* lacks a flange (b) and a secondary tibial deflection (d) and, thus, does not appear in those graphs.
